# Supplementary material
Source: PubMed Central journal article supplement (PMC5364314)
Supplement: IAI.00066-17_zii999092013s1.pdf [file IAI.00066-17_zii999092013s1.pdf]

## Supplementary Figure 1

A

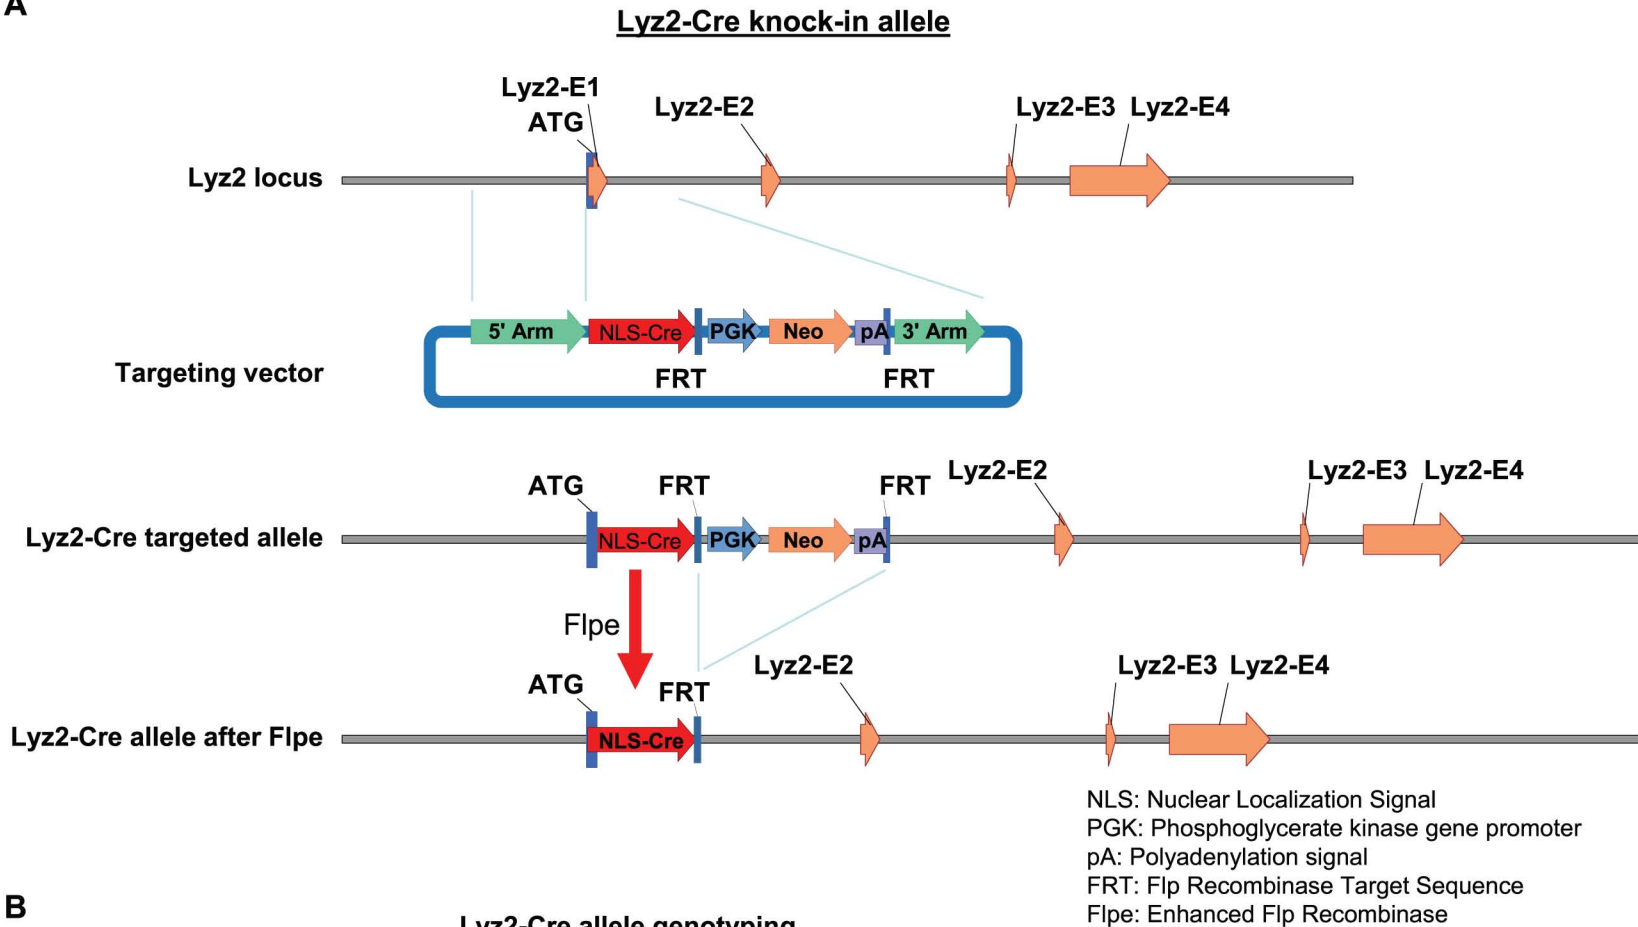

B

**Lyz2-Cre allele genotyping**

**Detection of *Lyz2-Cre* knock-in allele:**

Sense primer (A): Cre-F3 TTGTCATGAACTATATCCGTAACCTGGA

Antisense primer (B): Lyz2-3R CGGCCAGGCTGACTCCATAGTA

PCR products: WT = N/A; Cre knock-in allele = 285 bp

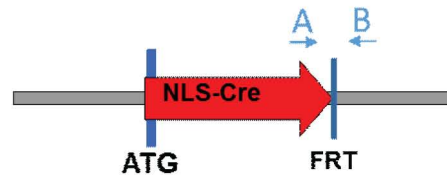

**Supplementary Figure 1. Production of BALB/cJ *Lyz2-Cre* knock-in mice.** (A) Schematic representation of gene targeting method used in the production of the *Lyz2-Cre* knock-in mice. (B) The locations and sequences of the PCR primers used to confirm the gene targeting and sizes of the expected PCR products are shown.
